# Supplementary material
Source: PubMed Central journal article supplement (PMC6618306)
Supplement: NIHMS1026742-supplement-supplement.pdf [file NIHMS1026742-supplement-supplement.pdf]

## Supplementary Figures

| Groups          | MPTP Lesions                                                                      | Degeneration Interval                                                             | Behavioral                                                                        | BBB Openings                                                                      | MRI Validation                                                                    | Injection                                                                         | Application Interval | Restoration Interval | Behavioral                                                                          | Staining and Imaging                                                                |
|-----------------|-----------------------------------------------------------------------------------|-----------------------------------------------------------------------------------|-----------------------------------------------------------------------------------|-----------------------------------------------------------------------------------|-----------------------------------------------------------------------------------|-----------------------------------------------------------------------------------|----------------------|----------------------|-------------------------------------------------------------------------------------|-------------------------------------------------------------------------------------|
|                 |  |  |  |  |  |  |                      |                      |  |  |
|                 | 5 days                                                                            | 21 days                                                                           | 2 days                                                                            | 60 sec/ea                                                                         | 30 min                                                                            | 10 min                                                                            | 14 days              | days                 | 2 days                                                                              |                                                                                     |
| <i>Phase I</i>  |                                                                                   |                                                                                   |                                                                                   |                                                                                   |                                                                                   |                                                                                   |                      |                      |                                                                                     |                                                                                     |
| A<br>n=7        | +                                                                                 | +                                                                                 | -                                                                                 | -                                                                                 | +                                                                                 | -                                                                                 | +                    | 14                   | -                                                                                   | +                                                                                   |
| B<br>n=7        | +                                                                                 | +                                                                                 | -                                                                                 | +                                                                                 | +                                                                                 | -                                                                                 | +                    | 14                   | -                                                                                   | +                                                                                   |
| C<br>n=7        | +                                                                                 | +                                                                                 | -                                                                                 | +                                                                                 | +                                                                                 | NTN                                                                               | +                    | 14                   | -                                                                                   | +                                                                                   |
| D<br>n=5        | +                                                                                 | +                                                                                 | -                                                                                 | -                                                                                 | +++                                                                               | -                                                                                 | +++                  | 14                   | -                                                                                   | +                                                                                   |
| E<br>n=5        | +                                                                                 | +                                                                                 | -                                                                                 | +++                                                                               | +++                                                                               | -                                                                                 | +++                  | 14                   | -                                                                                   | +                                                                                   |
| F<br>n=5        | +                                                                                 | +                                                                                 | -                                                                                 | +++                                                                               | +++                                                                               | NTN                                                                               | +++                  | 14                   | -                                                                                   | +                                                                                   |
| <i>Phase II</i> |                                                                                   |                                                                                   |                                                                                   |                                                                                   |                                                                                   |                                                                                   |                      |                      |                                                                                     |                                                                                     |
| G<br>n=8        | +                                                                                 | +                                                                                 | +                                                                                 | -                                                                                 | +                                                                                 |                                                                                   | +                    | 70                   | +                                                                                   | +                                                                                   |
| H<br>n=8        | +                                                                                 | +                                                                                 | +                                                                                 | -                                                                                 | +                                                                                 | AAV <sub>1</sub> -GDNF                                                            | +                    | 70                   | +                                                                                   | +                                                                                   |
| I<br>n=8        | +                                                                                 | +                                                                                 | +                                                                                 | +                                                                                 | +                                                                                 |                                                                                   | +                    | 70                   | +                                                                                   | +                                                                                   |
| J<br>n=10       | +                                                                                 | +                                                                                 | +                                                                                 | +                                                                                 | +                                                                                 | AAV <sub>1</sub> -GDNF                                                            | +                    | 70                   | +                                                                                   | +                                                                                   |

**Supplementary Figure 1:** Summary of the experimental groups and the procedures undergone.

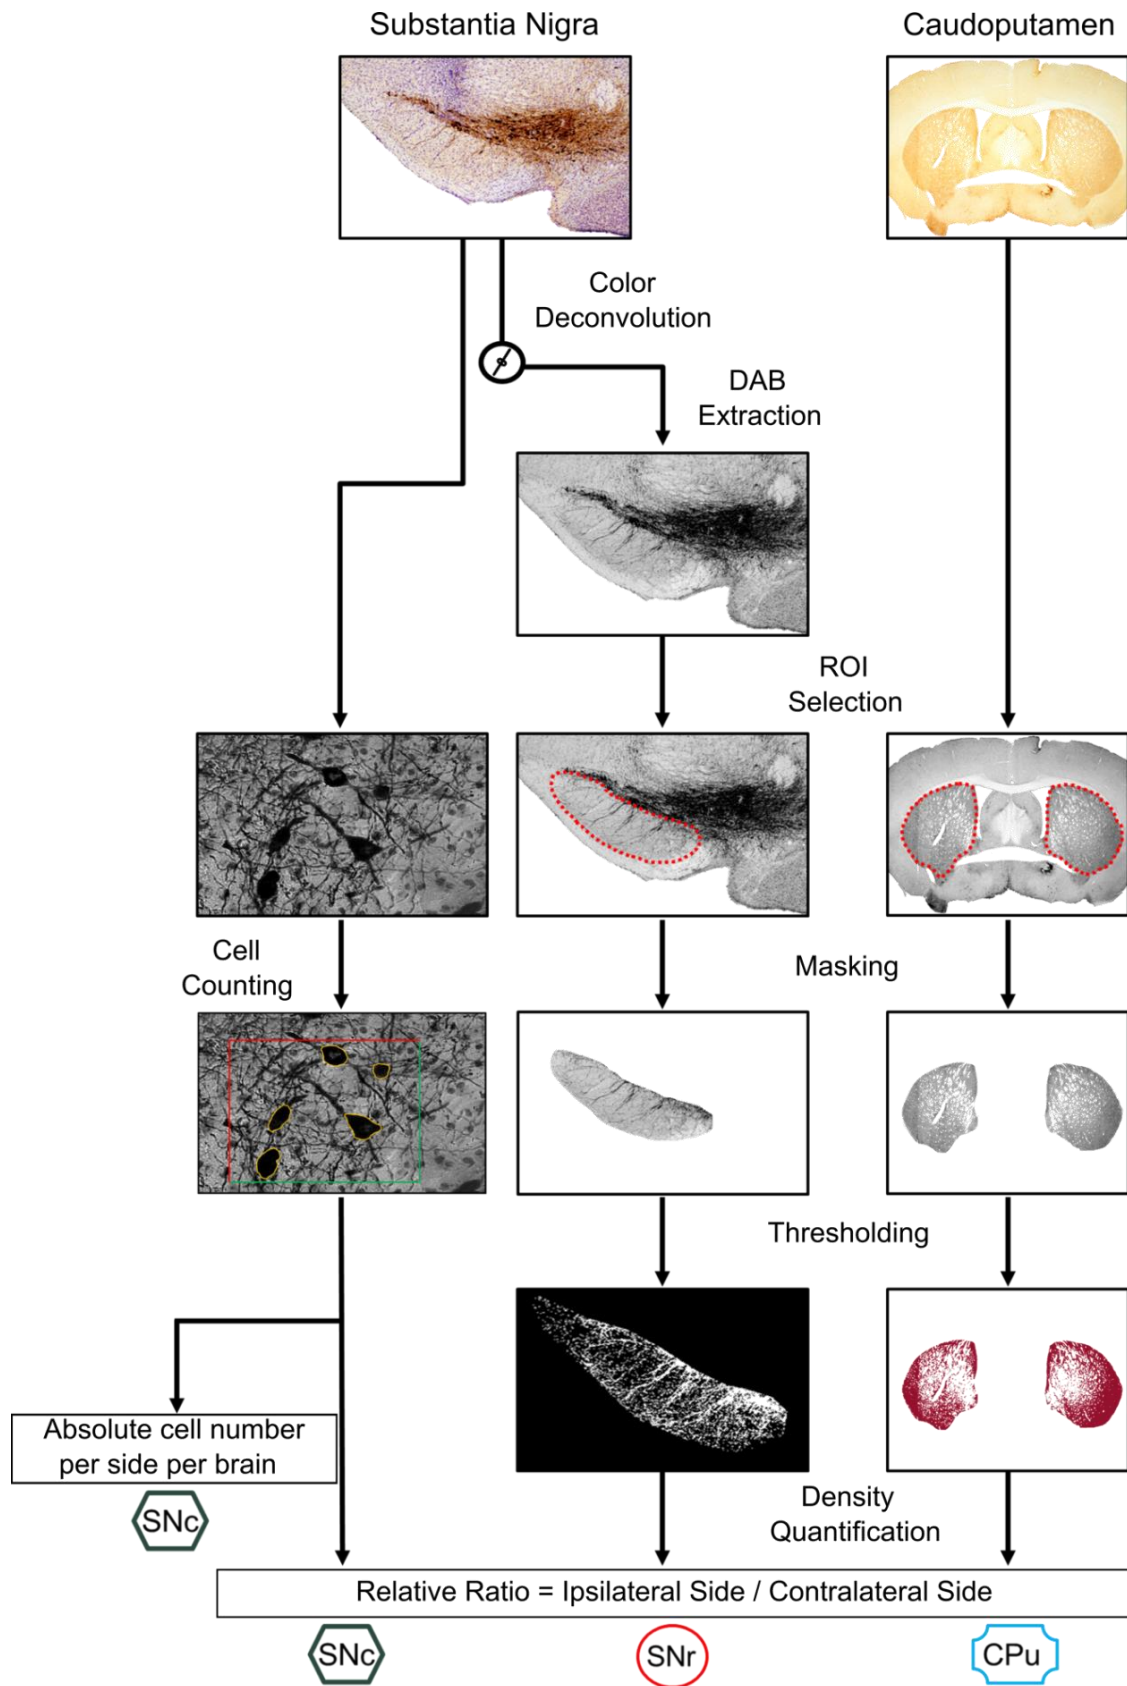

**Supplementary Figure 2:** Workflow of the quantification process. Brain sections at the level of the Substantia Nigra (SN) region were used for cell counting resulting in the absolute cell number per side of the brain. The double-stained images were color-deconvoluted after being white-balanced before further analysis. The Substantia Nigra reticulata (SNr) region was selected from the extraction of the DAB channel, masked and thresholded. The percent of the pixels surpassing the threshold was quantified. Respectively, the Caudate-Putamen region was selected and masked from the rest of the image. The pixels that surpassed the threshold were marked as dark red and are overlaid onto the raw image. The relative ratio of the ipsilateral over the contralateral side was quantified and is presented here.

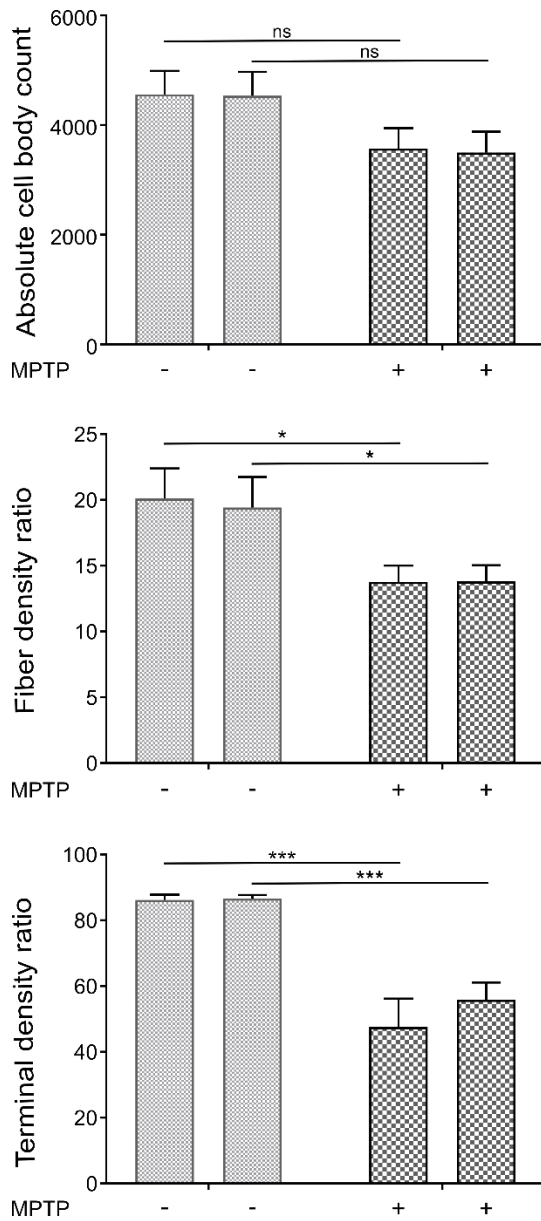

**Supplementary Figure 3:** Comparison of the MPTP-treated brains with the control group. There was a ~22% reduction in TH-positive neurons compared to saline-injected controls (two way ANOVA,  $F_{[1, 12]} = 3.191$ ;  $P=0.0993$ ), a ~33% reduction of TH-immunoreactivity in the SNr region (two way ANOVA,  $F_{[1, 8]} = 5.335$ ;  $P=0.0497$ ) and a ~40% in the CPU region (two way ANOVA,  $F_{[1, 8]} = 25.64$ ;  $P=0.0010$ ).

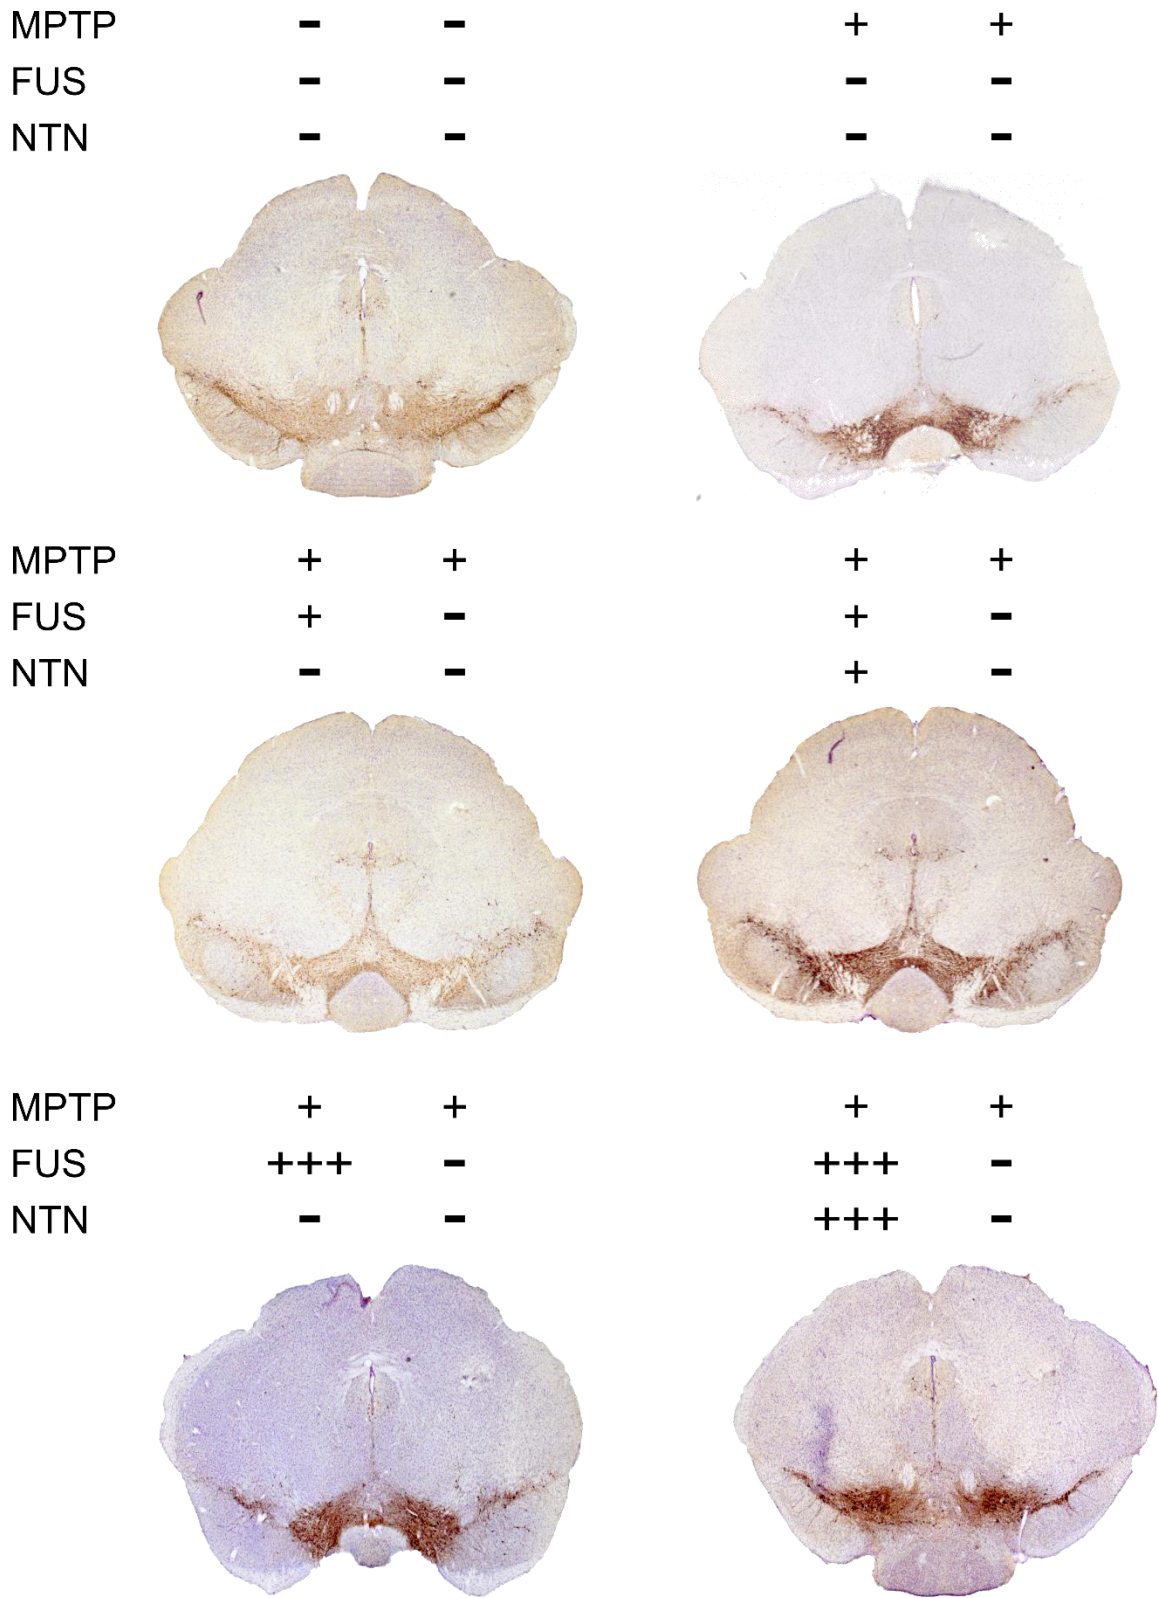

**Supplementary Figure 4:** Large version of the Substantia Nigra images presented in Figures 1 and 3.

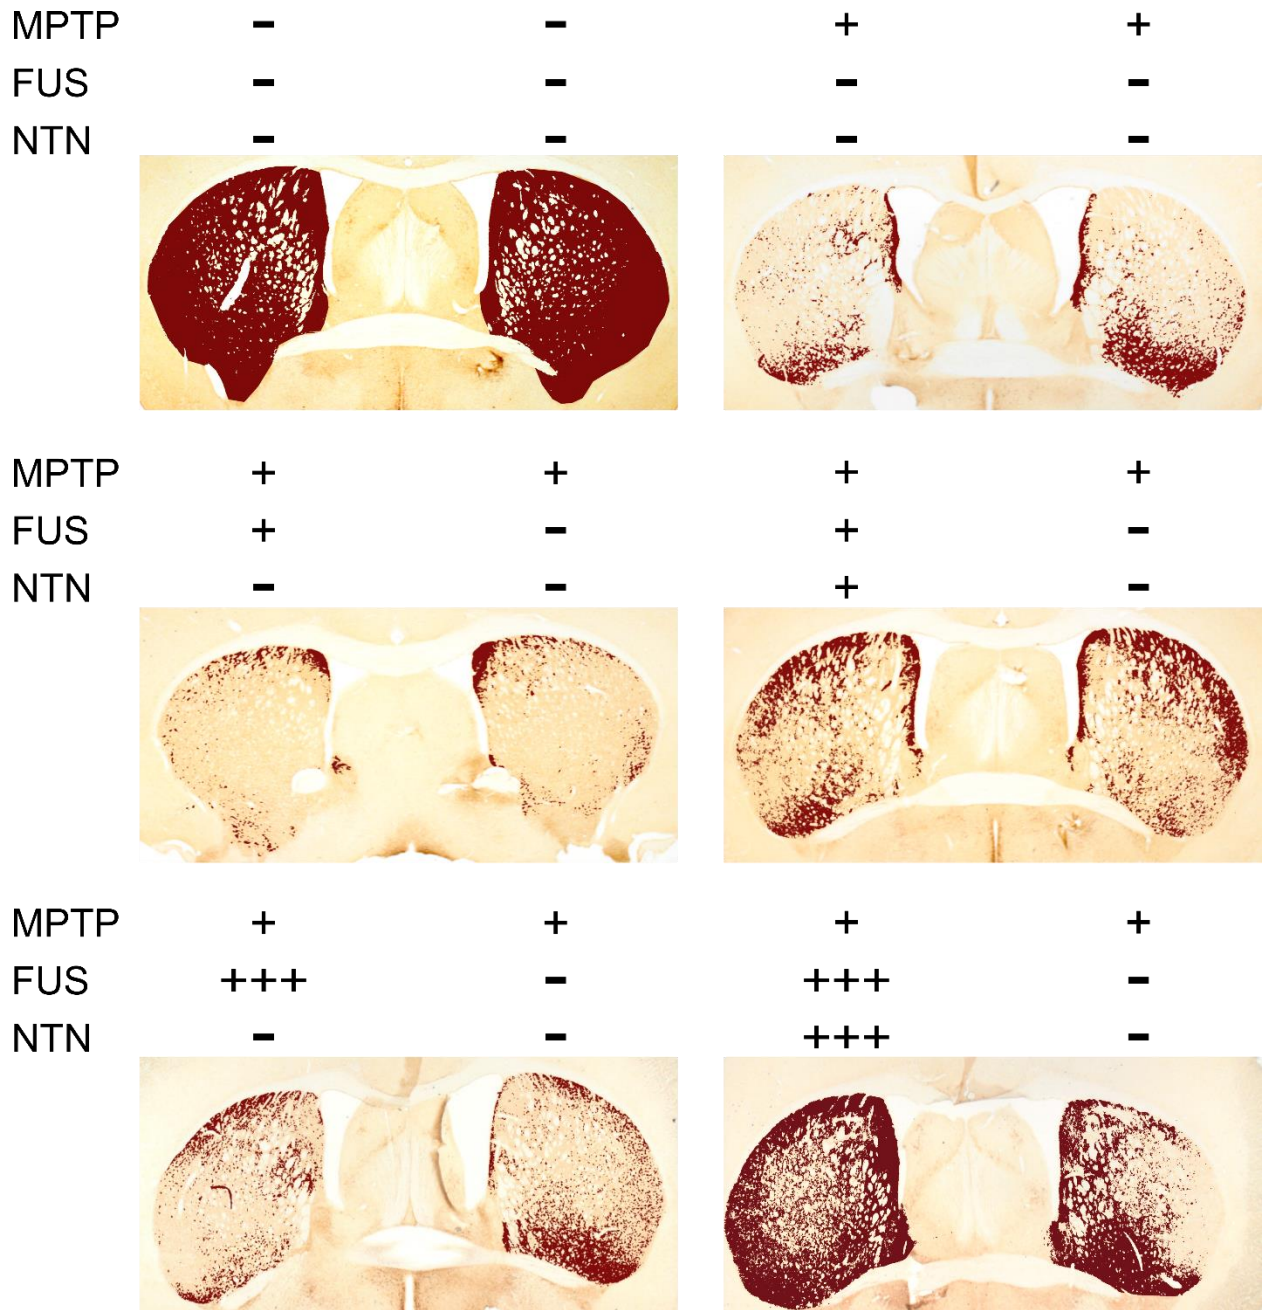

**Supplementary Figure 5:** Large version of the Caudoputamen images presented in Figures 1 and 4.

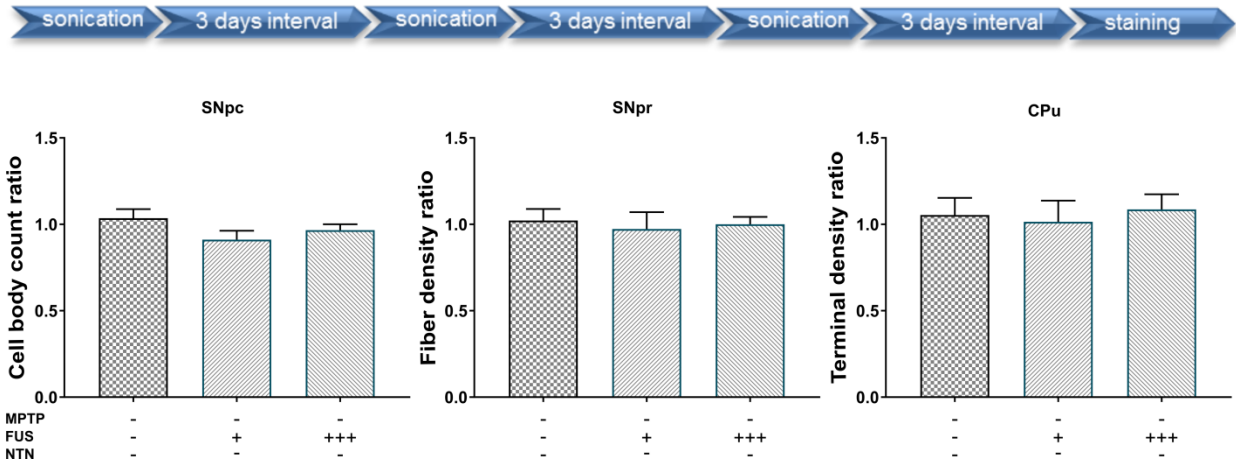

**Supplementary Figure 6:** Wild-type mice were sonicated none, one or three times in the SN and CPu regions to investigate the effect of ultrasound on the nigrostriatal pathway. One-way ANOVA (mean  $\pm$  SEM) showed no significant differences in the cell body (one way ANOVA,  $F_{[2, 12]} = 1.755$ ;  $P=0.2145$ ), fiber (one way ANOVA,  $F_{[2, 12]} = 0.1158$ ;  $P=0.8917$ ) and terminal (one way ANOVA,  $F_{[2, 12]} = 0.1193$ ;  $P=0.8886$ ) density ratios of the ipsilateral over the contralateral side.

|     |   |   |   |   |   |   |   |   |
|-----|---|---|---|---|---|---|---|---|
| AAV | - | - | + | + | - | - | + | + |
| FUS | - | - | - | - | + | - | + | - |

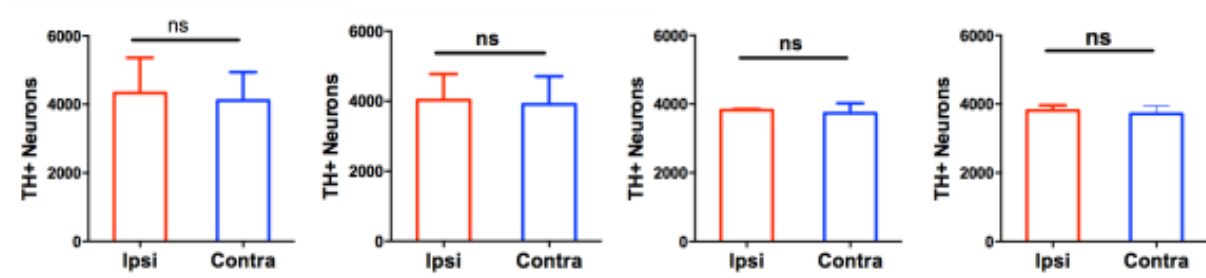

**Supplementary Figure 7:** AAV and FUS treatment does not alter TH+ neuron distribution in intraperitoneal saline-injected mice (n=3). No intra-group significant differences were found.



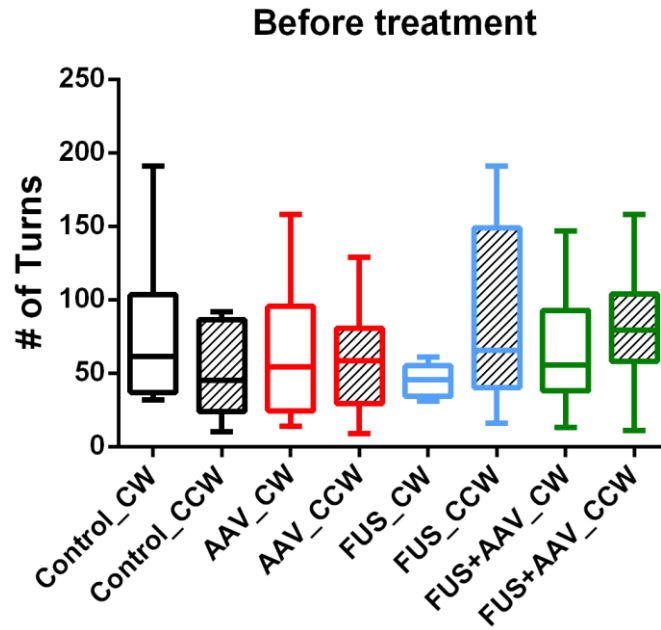

**Supplementary Figure 8:** Amphetamine-induced behavioral studies were performed before treatment where no intra-group significant rotational difference was observed (n=6-10).

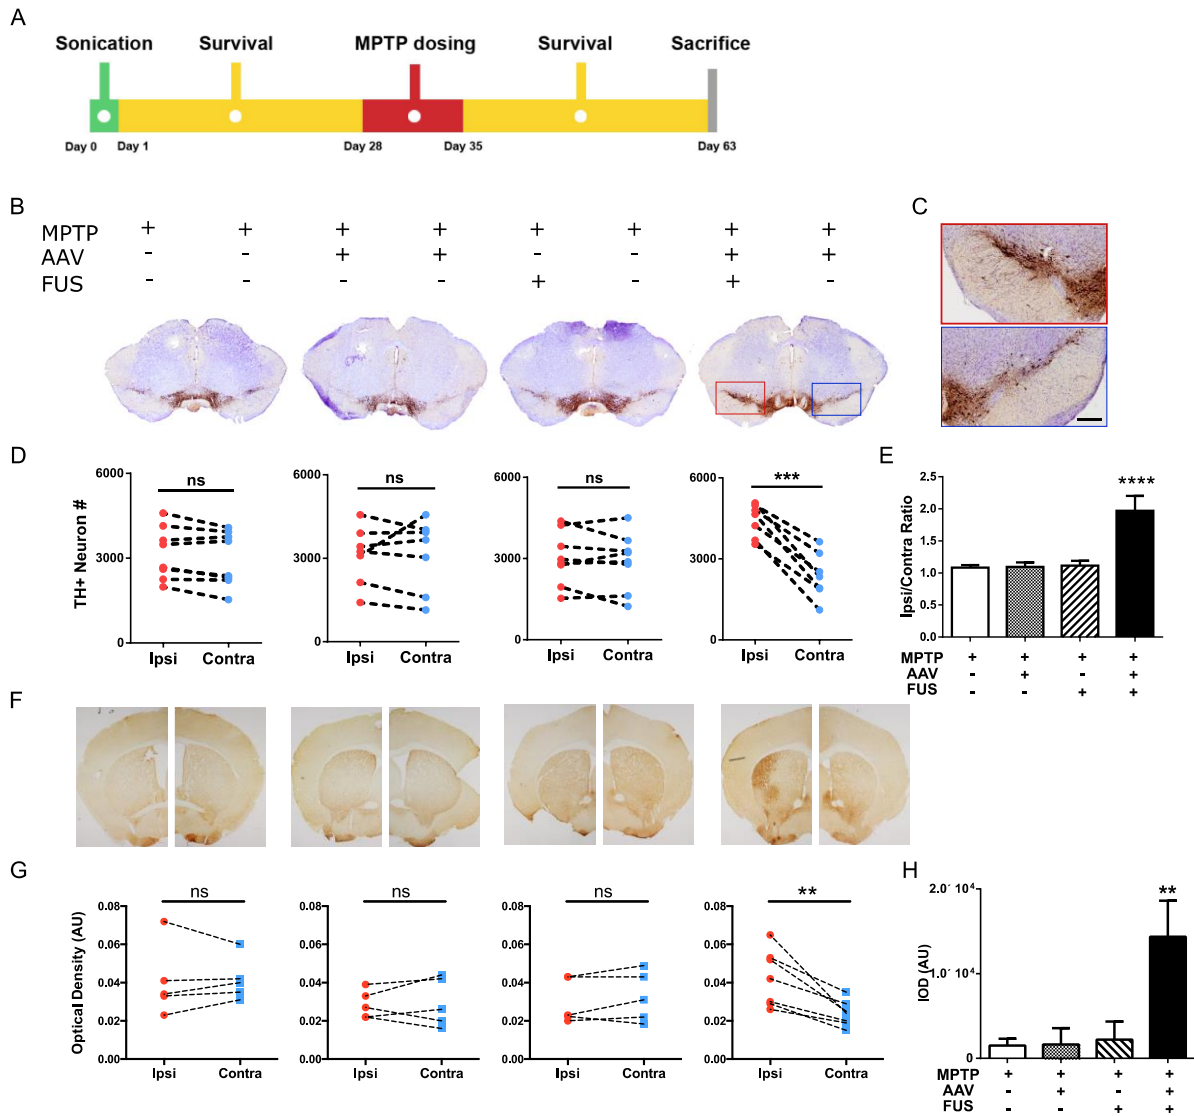

**Supplementary Figure 9:** FUS-facilitated AAV-GDNF delivery induced neuroprotection in MPTP mice. A) Experimental timeline for neuroprotection. B) An example of TH-positive neurons and projections in the substantia nigra (counter-stained with Nissl, scale bar = 10  $\mu$ m). C) TH staining in the substantia nigra in 4 experimental groups that received a combination of AAV and FUS treatment. TH+ neurons are stained in brown (n=7-8). D) High magnification of the SN region: top image AAV+/FUS+; bottom image AAV-/FUS-. E) Total number of TH+ neurons in each hemisphere of the four groups corresponding to the experimental conditions indicated in C. F) The ratio of the number of TH+ neurons on the ipsilateral to contralateral side. The AAV+/FUS+ mice showed a significantly higher ratio based on two-way ANOVA analysis. G) TH

staining of the Striatum revealed prominent dopaminergic projection preservation on the AAV+/FUS+ side. H) Quantitative analysis of optical density (OD) of the striatum. A significantly higher OD was observed on the AAV+/FUS+ side when compared to the contralateral side. I) Integrated optical density (IOD) was calculated and two-way ANOVA revealed significant difference was noted in the AAV+/FUS+ group. All error bars represent standard deviation. \*\* $p < 0.01$ , \*\*\* $p < 0.001$ , and \*\*\*\* $p < 0.0001$ .
